# Supplementary material for: De novo biosynthesis and whole-cell catalytic production of paracetamol on a gram scale in Escherichia coli
Source: Royal Society of Chemistry journal article supplement (doi:10.1039/d1gc02591k), 2021-01-01
Supplement: d1gc02591k1.pdf [file d1gc02591k1.pdf]

## De novo Biosynthesis and Whole-cell Catalytic Production of Paracetamol on a Gram Scale in *Escherichia coli*

Feifei Hou,<sup>1</sup> Mo Xian<sup>1\*</sup> and Wei Huang<sup>1,2\*</sup>

**Table S1. Strains and plasmids used in this study.**

| Resource                                          | Description                                     | Reference or source |
|---------------------------------------------------|-------------------------------------------------|---------------------|
| <b>Strains</b>                                    |                                                 |                     |
| <i>E. coli</i> DH5 $\alpha$                       | For cloning work                                | Novagen             |
| <i>E. coli</i> BL21(DE3)                          | For protein expression                          | Novagen             |
| <i>E. coli</i> BL21(DE3)-pGro7                    | For protein expression                          | In this study       |
| <i>Escherichia coli</i> str. K-12 substr. MG1655  | For genes cloning                               | Novagen             |
| PA-PABA                                           | For the production of PABA                      | In this study       |
| PA1                                               | For the production of <i>p</i> -acetamidophenol | In this study       |
| PA2                                               | For the production of <i>p</i> -acetamidophenol | In this study       |
| PA3                                               | For the production of <i>p</i> -acetamidophenol | In this study       |
| PAB4                                              | For the production of <i>p</i> -acetamidophenol | In this study       |
| PAB10                                             | For the production of <i>p</i> -acetamidophenol | In this study       |
| PAD4                                              | For the production of <i>p</i> -acetamidophenol | In this study       |
| PAE3                                              | For the production of <i>p</i> -acetamidophenol | In this study       |
| PADF2                                             | For the production of <i>p</i> -acetamidophenol | In this study       |
| <b>plasmids</b>                                   |                                                 |                     |
| pET-duet-1                                        | Plasmid with ColE replication origin            | Novagen             |
| pACYC-duet-1                                      | Plasmid with p15A replication origin            | Novagen             |
| pET-28a                                           | Plasmid with pBR322 replication origin          | Novagen             |
| pET28a-PANAT (P3)                                 | PANAT expressed from plasmid pET-28a            | In this study       |
| pETduet-ABH (P2)                                  | ABH expressed from plasmid pET-Duet-1           | In this study       |
| pETduet-ABH60 (PB4)                               | ABH60 expressed from plasmid pET-Duet-1         | In this study       |
| pETduet-ABH47 (PB3)                               | Pathway constructed in pACYC-Duet-1             | In this study       |
| pETduet-ABH42 (PB2)                               | Pathway constructed in pACYC-Duet-1             | In this study       |
| pETduet-ABH37 (PB1)                               | Pathway constructed in pACYC-Duet-1             | In this study       |
| pETduet-ABH60 <sup>T226V</sup> (PB5)              | For site directed mutagenesis in ABH60          | In this study       |
| pETduet-ABH60 <sup>G272V</sup> (PB6)              | For site directed mutagenesis in ABH60          | In this study       |
| pETduet-ABH60 <sup>G290V</sup> (PB7)              | For site directed mutagenesis in ABH60          | In this study       |
| pETduet-ABH60 <sup>T226V/G272V</sup> (PB8)        | For site directed mutagenesis in ABH60          | In this study       |
| pETduet-ABH60 <sup>T226V/T290V</sup> (PB9)        | For site directed mutagenesis in ABH60          | In this study       |
| pETduet-ABH60 <sup>G272V/T290V</sup> (PB10)       | For site directed mutagenesis in ABH60          | In this study       |
| pETduet-ABH60 <sup>T226V/G272V/T290V</sup> (PB11) | For site directed mutagenesis in ABH60          | In this study       |

|                                     |                                        |               |
|-------------------------------------|----------------------------------------|---------------|
| pET28a-PANAT <sup>K211A</sup> (PC1) | For site directed mutagenesis in PANAT | In this study |
| pET28a-PANAT <sup>K211G</sup> (PC2) | For site directed mutagenesis in PANAT | In this study |
| pACYCduet- <i>aroF-pabAB-pabC</i>   | Pathway constructed in pACYC-Duet-1    | In this study |
| PF3                                 | Pathway constructed in pET-28a         | In this study |
| PF4                                 | Pathway constructed in pACYC-Duet-1    | In this study |

**Table S2. Primers for strains construction in this study.**

| Primers | Sequence 5'-3'                                          | Restrict enzyme sites | Purpose                                                            |
|---------|---------------------------------------------------------|-----------------------|--------------------------------------------------------------------|
| ABHF    | TAAGGATCCGATGAGTCAG<br>CAGG                             | BamHI                 | Used for plasmid (pETduet-ABH) construction                        |
| ABHR    | TAACTCGAGCAGAACGGC<br>GCGC                              | XhoI                  |                                                                    |
| ABH60F  | tcatcaccacagccaggatccGATGGT<br>GCAGGGCGAAC              | BamHI                 | Used for plasmid (pETduet-ABH60) construction                      |
| ABH60R  | ggtttctttaccagactcgagTTGATG<br>GCTAATGCTTAAAC           | XhoI                  |                                                                    |
| ABH47F  | tcatcaccacagccaggatccGATGA<br>GCGAAGATGGT               | BamHI                 | Used for plasmid (pETduet-ABH47) construction                      |
| ABH47R  | ggtttctttaccagactcgagCAGATG<br>CGCGCG GCT               | XhoI                  |                                                                    |
| ABH42F  | tcatcaccacagccaggatccGATGG<br>CGAGCGCGACC               | BamHI                 | Used for plasmid (pETduet-ABH42) construction                      |
| ABH42R  | ggtttctttaccagactcgagCATAAT<br>GCTGCAGCC                | XhoI                  |                                                                    |
| ABH37F  | tcatcaccacagccaggatccGATGA<br>GCAATATTCGCG              | BamHI                 | Used for plasmid (pETduet-ABH37) construction                      |
| ABH37R  | ggtttctttaccagactcgagCAGTTTG<br>CTCAGCAT                | XhoI                  |                                                                    |
| PANATF  | TAA <u>C</u> ATATGGGCAGCAGCC<br>ATCAT                   | NdeI                  | Used for plasmid (pET28a-PANAT) construction                       |
| PANATR  | TAACTCGAGCGCGCTAATT<br>AAGCCCGCT                        | XhoI                  |                                                                    |
| arofF   | tcatcaccacagccaggatccGATGC<br>AGAAAGATGCGCTGAAC         | BamHI                 | Used for plasmid (pACYCduet- <i>aroF-pabAB-pabC</i> ) construction |
| arofR   | tttctgcatgaattcggatccCTCCTTT<br>TACGCAACGCGCGGGTCA<br>G | BamHI                 |                                                                    |
| pabABF  | ccacagccaggatccgaattcGATGC<br>GCGTGCTGATCATT            | EcoRI                 |                                                                    |
| pabABR  | gcattatgcgccgcaagcttCGGAAA<br>TTCCACACCCAGC             | HindIII               |                                                                    |
| pabCF   | taagaaggagatatacatatgATGTTC<br>CTGATTAACGGCCATAAAC      | NdeI                  |                                                                    |
| pabCR   | ggtttctttaccagactcgagATTCGG                             | XhoI                  |                                                                    |

|  |                |  |  |
|--|----------------|--|--|
|  | ACGTTCGCATAACG |  |  |
|--|----------------|--|--|

**Table S3. Sequences of the genes (*aroF*, *pabAB*, *pabC*, *PANAT*, *ABH*, *ABH60*, *ABH47*, *ABH42*, *ABH37*, *mtrF*) after codon optimization.**

|                                                                                                                                                                                                                                                                                                                                                                                                                                                                                                                                                                                                                                                                                                                                                                                                                                                                                                                                                                                                                                                                                                                                                                                                                                                                                                                                                                                                                                                                                                                                          |
|------------------------------------------------------------------------------------------------------------------------------------------------------------------------------------------------------------------------------------------------------------------------------------------------------------------------------------------------------------------------------------------------------------------------------------------------------------------------------------------------------------------------------------------------------------------------------------------------------------------------------------------------------------------------------------------------------------------------------------------------------------------------------------------------------------------------------------------------------------------------------------------------------------------------------------------------------------------------------------------------------------------------------------------------------------------------------------------------------------------------------------------------------------------------------------------------------------------------------------------------------------------------------------------------------------------------------------------------------------------------------------------------------------------------------------------------------------------------------------------------------------------------------------------|
| <i>aroF</i>                                                                                                                                                                                                                                                                                                                                                                                                                                                                                                                                                                                                                                                                                                                                                                                                                                                                                                                                                                                                                                                                                                                                                                                                                                                                                                                                                                                                                                                                                                                              |
| <p>ATGCAGAAAGATGCGCTGAACAACGTGCATATTACCGATGAACAGGTGCTGATGACCCCGG<br/> AACAGCTGAAAGCGGCGTTTCCGCTGAGCCTGCAGCAGGAAGCGCAAATTGCGGATAGCCG<br/> CAAAGCATTAGCGATATTATTGCGGGCCGCGATCCGCGCCTGCTGGTTGTTTGTGGACCTT<br/> GTAGCATTTCATGATCCGGAACCGCGCTGGAATATGCGCGCCGCTTTAAAGCGCTGGCGGC<br/> GGAAGTTAGCGATAGCCTGTATCTGGTGTATGCGCGTGTATTTGAAAAACCGCGCACCACC<br/> GTGGGCTGGAAGGCTTAATTAACGATCCGCATATGGATGGCAGCTTTGATGTGGAAGCGG<br/> GCCTGCAGATTGCGCGCAAACCTGCTGCTGGAACCTGGTGAACATGGGCCTGCCGCTGGCGAC<br/> CGAAGCGTTAGATCCTAACAGCCCGCAATATCTGGGCGATCTGTTAGCTGGAGCGCGATT<br/> GGCGCGCGCACCACCGAAAGCCAAACCCATCGTGAATGGCGAGCGGCTTAAGCATGCCG<br/> GTGGGCTTTAAAAACGGCACCGATGGCAGCCTGGCGACC GCGATTAATGCGATGCGCGCGG<br/> CAGCACAACCTCATCGTTTTGTGGGCATTAATCAGGCGGGCCAGGTGGCGTTATTACAGAC<br/> CCAAGGTAATCCGGATGGTCATGTGATTCTGCGCGGCGGCAAAGCGCCGAATTATAGCCCG<br/> GCGGATGTGGCGCAATGCGAAAAAGAAATGGAACAGGCGGGCCTGCGCCCAGCTTAATG<br/> GTTGATTGTAGCCATGGCAACAGCAACAAAGATTATCGCCGCCAGCCGGCGGTGGCGGAAA<br/> GCGTTGTTGCGCAAATTAAGATGGCAACCGCAGCATTATTGGCCTGATGATTGAAAGCAA<br/> CATTACGAAGGCAACCAGAGCAGCGAACAGCCGCGCAGCGAAATGAAATATGGCGTGAG<br/> CGTGACCGATGCGTGCATTAGCTGGGAAATGACCGATGCGCTGCTGCGCGAAATTCATCAG<br/> GATCTGAACGGCCAGCTGACCGCGCGCGTTGCG</p>                                                                                                                                                                                                                                                                                                                    |
| <i>pabAB</i>                                                                                                                                                                                                                                                                                                                                                                                                                                                                                                                                                                                                                                                                                                                                                                                                                                                                                                                                                                                                                                                                                                                                                                                                                                                                                                                                                                                                                                                                                                                             |
| <p>ATGCGCGTGCTGATCATTGATAACTACGACAGCTTCACCTTTAATCTGGCGACCTATGTGGA<br/> AGAAGTGACCGGTGCGGCACCAACCGTTGTTCCAAATGATGCGCAGATTGATGAAACCCTG<br/> TTGATGCGGTGATTATTAGCCCGGGTCCAGGTCATCCAGGTGTTGCGGCGGATTTTGGTAG<br/> TTGCCGCGGCGTTATTGAACGTGGCCTGGTTCCAGTTTTGGGTGTGTGCCTGGGCCATCAAG<br/> GTATTGCGCTGGCACATGGTGGTGCAGTTGGTCCAGCACCAGTTCAGTTCATGGTCAGGTG<br/> ACCCGCATTCATCATGATGGCAGCGAACTGTTTGTATGCGATTCCGCCGCGAGTTTGTATGCGGT<br/> GCGCTATCATAGTCTGGTGGCGACCGATTTGCCACCGGAATTGGAAGTTACCGCGCGTACC<br/> GGCGATGGTTTGATTATGGCGCTGCGCCATCGCGAATTACCACAGTGGGGCGTGCAGTTTC<br/> ATCCGGAAGCATTGGCGGCCAGTTTGGCCATCGCATTATGGCGAATTTTCTGAGTCTGGCG<br/> CGTCGTCAAGCACATCGTTGGGAAATTACCGAACATGTGGTGGAAACCAGCGTTGATCCGG<br/> CGGCGGTGTTTGAACCTCTGTTTGCGGGCAGCGAACATGCGTTTTTGGCTGGATGATCCGCAG<br/> GGCACCACCTATATGGGTGATGCGAGCGGTCCACATGCACGTATTCGCACCCATCGTGTGG<br/> GTGAAGGCGAACTGTTTATTGGCTGCGCGATGATCTGCGCCGTAATCGTGTGCGCCAGGT<br/> GTTGGCTTTCGCTTAGGTTGGGTGGGCTATCTGGGCTATGAAATGAAAGCGGAATGCGGCG<br/> TGGATAATCGTCATGCGAGCAGCCATCCAGATGCGCATCTGATTTTTGCGGATCGCGCGATT<br/> GCGATTGAACCAGGCCGCGTGTGGTTAATGGCACTGGGCGAACAGGGTGAATGGTTTGGCG<br/> AAATGACTGCGGCGCTGGGTCAATTACGTCCACCACGTGCAGCGGCGGCCAGCAGCGCA<br/> ATTGACCGTTCGTGATGATCGCGATAGCTATCTGGATATGATTGCGCGCGCGCAGGAATTG<br/> ATTACCGCGGCGAAAGCTATGAAATTTGCCTGACCACCAATTGCGTGCGGAAGTGGAAAG<br/> TTGATCCGTTGGCGGCGTATTTAGCTCTGCGTGCAGCGAATCCAACCAGCTATGGCAGCTTT<br/> CTGCAGTTGGGCGAAATGGCGGTTTTAAGCAGCAGCCCGGAACGCTTTATTACCATTGATG<br/> CGAGCGGTGCGGTTGAAAGCAAACCGATTAAAGGTACCCGCCACGTGGTAGCACCGAACA</p> |

AGAAGATGCGGCGCTGATTGCGGATCTGACCGATAATCCGAAAGATCGCGCGGAAAATCTG  
ATGATTGTGGATCTGGTGCGCAATGATTTAGCGCGTGGTGCGCAACCAGCAACCGTTCAAG  
TGAAAAACTGTTTGACGTGGAACCTATGCGACCGTGCATCAGCTGGTGAGCACCATTAC  
CGCGCAGCTGGAAGGCAAAGATCCGATTGATTGCGTGCCTGCGGCGTTTCCGGGTGGTAGC  
ATGACTGGTGCGCCGAAAATTCGCACCATGGAGATTATTGATGAACTGGAACCGGTCCGC  
GCGGTGTTTATAGCGGTGGCCTGGGCTATTTTAGTCTGGATGGCGCGGTTGATCTGAGCATG  
GTGATTGCGACCGTGGTGTATACCCAGGCGTGTGGAATATGGTGTGGGTGGTGGCGATTTT  
GGCGTTGAGTGATCCAGCGGCGGA

***pabC***

ATGTTCCCTGATTAACGGCCATAAACAGGAAAGCCTGGCGGTTAGCGATCGTGCGACCCAAT  
TTGGCGATGGCTGCTTTACCACCGCGCGCGTGATTGATGGCAAAGTGAGCCTGCTGAGCGC  
GCATATTCAGCGTCTGCAGGATGCATGTCAGCGCCTGATGATTAGCTGCGATTTTTGGCCGC  
AGCTGGAACAGGAAATGAAAACCCTGGCGGCGGAACAACAAAATGGCGTGCTGAAAGTGG  
TTATTAGCCGCGGTAGTGGTGGTCGTGGCTATAGCACCTTGAATAGCGGTCCAGCGACCCGT  
ATTTAAAGCGTGACCGCGTATCCGGCGCATTATGATCGCCTGCGCAATGAAGGTATTACCCT  
GGCGCTGAGCCCAGTTCGTTTAGGCCGTAATCCACATCTGGCGGGCATTAAACATCTGAATC  
GCCTGGAACAGGTGCTGATTCGCAGCCATCTGGAACAGACCAATGCGGATGAAGCGCTGGT  
GCTGGATAGTGAAGGCTGGGTGACCGAATGTTGCGCGGCGAATCTGTTTTGGCGCAAAGGC  
AATGTGGTGTATACCCCGCGTTTGGATCAGGCAGGCGTGAATGGTATTATGCGCCAGTTTTG  
CATTGCTGCTGGCGCAGAGCAGTTATCAGCTGGTGGAAGTGCAAGCGAGCCTGGAAGAA  
AGCCTGCAGGCGGATGAAATGGTGAATTTGCAATGCGCTGATGCCGGTTATGCCGGTTTG

***PANAT***

ATGACTCCTCTGACCCCTGAACAGACCCATGCGTATCTGCATCATATTGGCATTGATGATCC  
TGGTCCTCCGAGCCTGGCGAATTTAGATCGCCTGATCGATGCGCATTACGCCGCGTTGCGT  
TTGAAAACCTGGATGTGCTGCTGGATCGCCGATTGAAATTGATGCGGACAAAGTGTTTGC  
GAAAGTGGTGAAGGTAGCCGTGGCGGCTATTGCTTTGAACTGAACAGCCTGTTTGC  
CTGTTACTGGCGTTAGGCTATGAACTGGAAGTGGTGGCACGTGTTTCGTTGGGGTTTACC  
TGATGATGCGCCGTTAACCCAGCAGAGCCATTTAATGCTGCGCCTGTATCTGGCGGAAGGC  
GAATTTCTGGTGGATGTGGGCTTTGGTTCAGCGAACCCGCCTCGTGCATTACCTTTACCGGG  
CGATGAAGCAGATGCGGGTCAGGTTCAATGTGTTTCGCCTGGTGGATCCTCATGCGGGCTTAT  
ATGAAAGCGCGGTGCGTGGTTCGTAGCGGTTGGTTACCTCTGTATCGCTTTGATCTGCGCCG  
CAGCTGTGGATTGATTATATTCCGCGCAACTGGTATAACCAGCACCCATCCGCATAGCGTGTT  
TCGCCAGGGTCTGAAAGCGGCGATTACCGAAGGTGATCTGCGTCTGACCTTAGCGGATGGT  
CTGTTTGGTTCAGCGTGCGGGTAACGGTGAACCCCTGCAGCGTCAGTTACGCGATGTGGAAG  
AACTGCTGGATATTCTGCAGACCCGCTTTTCGTTTACGTTCTGGATCCGGCGTCAGAAGTTCCT  
GCACTGGCGCGTCTTTAGCGGGCTTAATTAGCGCGCTCGAG

***ABH***

ATGAGTCAGCAGGAACGTACCCGCGTGGCAATTGTGGGTGCAGGTATTGTGGGTCTGACCC  
TGGCCATTGCACTGAATGCCTTTGATAAAGAACGTAAACTGGCAATTGATATCTATGAAAA  
TGCAAGCGAACTGGCAGAAATTGGTGCCTGCAATTAATGTTTGGCCGCGCACCCCTGGCAATT  
TTTAAACAGATTGGTGTGGAAGATGCCCTGATTCCGCTGCTGGATCATATTCCGGATCTGGA  
ACCGCGTATTATTTTTGGTATTCGTAAAGGTGACGAAAAGAATGGCTATCAGGTTTATGATA  
CCATGAATAATGGCGGTGCACTGCGCGTTCATCGTGCATCTGCAGAATACCCTGATTGAG  
CATCTGCCGCTGCCGGGAGTAAAGTGACCGAAATTAATAGCATTGTTGGCTTTTCATCTGGG  
CCATAATCTGATTGATTATAGTCATCATAGCAGCAGTGGCCAGGGTCCGCTGACCCCTGCATT  
TTAGCGATGGCAAACCGAGTCGCACCTGTGATATTCTGGTGGGCGCAGATGGCATTAAAGAG

TACCCTGCGTCATCTGTTTCTGCCGCGCCTGCCGAATCCGGAAAAATATCTGAATTGCTATG  
AACCGAAATGGAAAGGTCTGCTGGCATATCGTGGTCTGGTCCGAAAGAAAACTGGAAGC  
CGTGAGCCCGGGCCATCGTGCCCTGACACATCCGGGCCTGATGTATAGCGGTAAAAGTGCC  
TATGCCGTGGTGTATCCGGTGAGTAATGGTAAATTCATTAATGTTGTGGCCATTGTGCATGA  
TAATCCGACCAATAGCACCGTGTGGCCGGGTCCGTGGCGTATGGATGTGACCCAGAGTGAA  
TTTTTCGAAGTTTATAAAGGTTGGGATGAAGAAGTTCTGGATCTGATTCGCTGTGTGGATAA  
ACCGACCAAATGGGCCCTGCATGCACTGGATCATCTGGATGTTTATGCCAAAGGCCGTGTTT  
TTCTGATGGGCGATGCCGCACATGCAATGCTGCCGCATCTGGGTGCAGGCGCCCATGTTGGT  
ATGGAAGATGCCTATATTCTGGCCAGTCTGATTACCCATAGTAGTACCCCGATTGGCCGAG  
CACCCAGCATGTGAGTGAAATTGCCAATATCTATAATACCATGCGCATTCCGCGCGCAGTTA  
GCATGAGTAATAGCACCGATGAAGCAGGTTATCTGTGTAATCTGGAAAATCCGGGTCTGGA  
AGAATTCAAAGTTGGCGATCATATTCCTAAAGAACTGCTGATTCAGACCGCCCGTACCATG  
GAAAAGAAATGGGCATGGACCACCACCTATGCCGATGAAGATCGCATTAAAGGCAATTAGTC  
TGCTGGAAGGTCCGCGCGCCGTTCTG

***ABH60***

ATGAGTCAGCAGGAACGTACCCGCGTGGCAATTGTGGGTGCAGGTATTGTGGGTCTGACCC  
TGGCCATTGCACTGAATGCCTTTGATAAAGAACGTAAACTGGCAATTGATATCTATGAAAA  
TGCAAGCGAACTGGCAGAAATTGGTGCCGGCATTAAATGTTTGGCCGCGCACCCCTGGCAATT  
TTAAACAGATTGGTGTGGAAGATGCCCTGATTCCGCTGCTGGATCATATTCCGGATCTGGA  
ACCGCGTATTATTTTTGGTATTCGTAAGGTGACGAAAAGAATGGCTATCAGGTTTATGATA  
CCATGAATAATGGCGGTGCACTGCGCGTTCATCGTGCCCATCTGCAGAATACCCTGATTAG  
CATCTGCCGCTGCCGGGCAGTAAAGTGACCGAAATTAATAGCATTGTGGCTTTCATCTGGG  
CCATAATCTGATTGATTATAGTCATCATAGCAGCAGTGGCCAGGGTCCGCTGACCCTGCATT  
TTAGCGATGGCAAACCGAGTCGCACCTGTGATATTCTGGTGGGCGCAGATGGCATTAAAGAG  
TACCCTGCGTCATCTGTTTCTGCCGCGCCTGCCGAATCCGGAAAAATATCTGAATTGCTATG  
AACCGAAATGGAAAGGTCTGCTGGCATATCGTGGTCTGGTCCGAAAGAAAAACTGGAAGC  
CGTGAGCCCGGGCCATCGTGCCCTGACACATCCGGGCCTGATGTATAGCGGTAAAAGTGCC  
TATGCCGTGGTGTATCCGGTGAGTAATGGTAAATTCATTAATGTTGTGGCCATTGTGCATGA  
TAATCCGACCAATAGCACCGTGTGGCCGGGTCCGTGGCGTATGGATGTGACCCAGAGTGAA  
TTTTTCGAAGTTTATAAAGGTTGGGATGAAGAAGTTCTGGATCTGATTCGCTGTGTGGATAA  
ACCGACCAAATGGGCCCTGCATGCACTGGATCATCTGGATGTTTATGCCAAAGGCCGTGTTT  
TTCTGATGGGCGATGCCGCACATGCAATGCTGCCGCATCTGGGTGCAGGCGCCCATGTTGGT  
ATGGAAGATGCCTATATTCTGGCCAGTCTGATTACCCATAGTAGTACCCCGATTGGCCGAG  
CACCCAGCATGTGAGTGAAATTGCCAATATCTATAATACCATGCGCATTCCGCGCGCAGTTA  
GCATGAGTAATAGCACCGATGAAGCAGGTTATCTGTGTAATCTGGAAAATCCGGGTCTGGA  
AGAATTCAAAGTTGGCGATCATATTCCTAAAGAACTGCTGATTCAGACCGCCCGTACCATG  
GAAAAGAAATGGGCATGGACCACCACCTATGCCGATGAAGATCGCATTAAAGGCAATTAGTC  
TGCTGGAAGGTCCGCGCGCCGTTCTG

***ABH47***

ATGAGCGAAGATGGTTCGCACCCGCATTGCGATTGTGGGCGCGGGTATTGTGGGCCTGAGTT  
TGGCGGTGACCCTGAATGCGTTTGATAACCGAACAGAAATTTGTGATCGATATGTACGAGAG  
CGCGCCGGAAGTGGCGGAAATTGGCGCGGGTATTAATGTGTGGCCGCGCACCTGGCAAATT  
CTGAAAGAAATTGGCATGGAAGAGACCCTGGAACCGCTGTTTATCATCGCCCGGATCTGG  
AACGCCGCGTGGTTTTTGAAGCGCGCAAAGCGGATCAGCGCACCGGCTTTAAAGTGGTGGGA  
TGTGATGAAAGATGGCGGCGTGTGCGCATTTCATCGCGCGGATTTTCAGCGCAGCCTGCTG  
AAACATCTGCCGGTGGCGGGTAGCAGCACCAAATAATACCACCTGCACCCTGCATCTGA

GCCATCGCTTAGTGGATTATGGCCCCGACCCCAAGCAGCAGCAGCGCGCAACATAGCGGTCC  
GGTTACCTTATATTTTACCGATAAACCGTGC GCGATTATTGACCATCTGATTCTGGTGCCGT  
GCATTCGCCAGCCGACCAAATGGCCATTGCAACGTTTGAATCATCTGGATCTGTATGCGGA  
AGGCCGCGTGATTCTGATTGGCGATGCGGCGCATGCGATGGTGCCACATCAAGGCCGCGGT  
GCGGGTGTGGTATTGAATATATGGGTAAAGAAAAGCACGCGGTGGTGTATCCGATTAGCG  
GCGGCAAACCTGATTAATATTGTGGCGACCGTGCATGATCGCAGCAAAGAAGGCACCGTGTA  
TGAAGGCACCGGCAATCAGGAAGTGACCCAGAGCGAATTTTTTAGCCATTTTAGCGGCTGG  
GAAGAAGAATTTT CAGGCGCTGCTGCGCTGCATTCGCCAGCCAACTAAATGGCCGCTGCAAC  
GCTTGAATCATCTGGATCTGTATGCGGAAGGCCGCGTGATTCTGATTGGCGATGCGGCGCAT  
GCGATGGTGCCACATCAAGGTGCGGGTGCGGGTGTGGTATTGAAGATGCGTATATTCTGG  
CGAGCCTGCTGACCCAGACCAGCGAAAGCCATCCGTTACCAATGCAGCGCATTAGCCATCT  
GGTGGATGTGTATAATACCGTGC GCGTGCCGCTGGCGACCAGCTTTGCGAAAGCGAGCATT  
AATCAGGGCCGCTATTATGGCCTGGAAGCGCCGGGTTTTGAACATATTAAGAAGGCGATG  
ATGTGCCGCGGATAAACTGACCGCGCTGTTACGCTTAGCGGATGATAATTGGAGCTGGAC  
CACCAGCAATCCGGAAAGCGATAAAAAACGCGCGATGGAAGTCTGCAGGAAAGCCGCGC  
GCATCTG

**ABH42**

ATGGCGAGCGCGACCCAAAAACCGTTGCGTGTTGCGATTGTGGGCGCGGGCATTGGTGGTT  
TAATGTTGACCATTGCGCTGCAGCATATGGATAAAGCGAAAAACTGGATATCCACGTGTA  
CGAGGCGGCGCCGGCACTGGGTGAAATTGGTGCAGGTATTAATCTGTGGCTGCGCAGCTGG  
GAAATTATGAAAGCGATTGGCCTGGAAGAAACCTTTGTGAAACTGATGGATGAAGCGCCGA  
CCGATGAAAGCCGCTGGTTTTCAACTGCGCAAAGCGATCAGCGCGAAGGCGAAGCGTT  
AAGCGATCTGATGATGAAAGGCGGCACCATGCGCTTTCATCGCGCGGCGTTACAAAAGCG  
CTGCTGGCACGTGTTGGTATTGTGTTAGCCTGAGCCCGCCTGGTTACCTATGCGGAATA  
TGAAAATCATGTGGAGCTGGAATTT CAGGACGGCTTTATTGTGAATTGCGATGTGCTGATTG  
CGGCGGATGGCATTAAAAGCGTGGTGC GCAAACAGTTTATGAAAAGCCTGGCGAAAGGCA  
CCTATATTGTGAATAGCGATCCGGTGTGGACCGGCACCTATGCGTATCGCGGTTTTGTTGAGC  
CATGAAGCGATTGAACGCGAATTTCCGGGCCATCGCGCGACCAAAAATGCGGTGATTTATT  
GCGGCAAATATAAGCACCTGGTGGTGTATCCGCTGAGCAATGGCCGCGATACCAATGTGGT  
GGCGTTTTGCACCGATCCGGCGCTGGAAGGCGCGGCGTGAATGAAGTTCACCAACCAGC  
GCGACCCAAGATGAATTGCGTGC G CAGTATATTGGCTGGGAAGATGAAGTGCAGGCGCTGA  
TTAATTGCATTGAAACCCCGACCAAATGGGCGATTAATAATCTGGACCCGCTGGAACGCTTT  
GCGGCGCATCGTGTTTTCTGGCGGGTGATAGCGCGCATGCGATGACCCACATCAAGGCG  
CGGGTGC GGGTCAAGCGATTGAAGATGCGTATATTCTGGCGAGCCTGCTGACCGCGGAAGG  
CGCGAGTCGTAAAGATATTCCGCGTATTGCGGAAGTGTATAATAAAATTCGCTGCCCGGCG  
GCGAATGCGATTCTGATGGCGAGCCGTGATCAGGGCAAATGGTGTGAACTGGATCATCCGG  
AACTGGAAGGCGTGAATGAAGGCGATATTCTGCCGAAAGAACGCCTGGAAGGCCTGTGCC  
GTGATATTAGCCAAGCGTGGGAATGGGTGTGGAAAACCAGCGCGGAAACCGATCGCCGCG  
AAGCGATTCTGATGCTGGGCGAAAAAGAAGTGGGCGGCTGCAGCATTATG

**ABH37**

ATGAGCAATATTCGCGTGGCGGTGATTGGCGGCGGCATTGGTGGTTTTAACCTTTTTCGTTGC  
GCTGGGCAAACAGAGCAATATTAAGTGGATATGTATGAGGCGGCGCGGAATTTGGCGA  
AGTGGGCGCGGGTATTGCGATGTGGTATCGCACTCAACAGATTATGGAAAACTGGGCCTG  
CATAATGATCTGGAAGCGCTGGCGGGCGGCGGAAAAAAGGTGCGGCGGAATTAGCGTTTC  
ATTTTCGCAAAGCGATCAGCCGGAAGGCCTGAGCTTTTATGATATGAATACCCGCGGCGG  
CATGTGGGCGTTTCATCGCGCAAATTT CAGAAAACCATTATCAACCACCTGCCGCCGACCT

GCACCAGCCATTTTGGTAAACGCCTGGTGGCGTATGATGCGCCGGTTAGCGGTCCAATTACC  
 CTGCATTTTAAAGATGGCACCGCGGCGGAATGCGATGTGCTGGTTGGTGC GGATGGCATTAA  
 AAAGCACCGTGCGCGCGATTATGTATAGCAATCTGGTGAAAGAAGGCAAGATTACCAAAG  
 AGGAAGTGCTGGAACCGAATCCGGTGTGGAGCGGCACCGTTGCGTATCGTGGTTTAATTAG  
 CAAAGAACGCCTGGAAGCGAAAATTCTGGGCCATCGCGCGCTGACCCGTGCGGTTTTGCAT  
 ATGGGTAAAAATAAACACCTGATCATCTTCCCGATCAACGACGCGCTGATTAACGTGGTGG  
 CGTTTTGCAGCGATTTTAGCAAAGAAGGCACCCAGTATAGCGAAGATAGCGGGCATTGGGT  
 GGTGGATGTGCCGAAAGAAGAACTGCTGCAGCAGTATGAAGGCTGGGAACCGGAAGTGAT  
 GGCGGTGTTGGAATGCATTGAAAAACCGAGCAAATGGGCGATTAATGTGGTGCGCCCGCCG  
 AGCACCTATGTGAGTGGTCATGTTGCGATTCTGGGCGATAGCGCGCATGCGATGACCCCGC  
 ATTTAGGCAGTGGTGCGGGTCAAGCGATTGAAGATGCGTATATTCTGGCGGCGCTGCTGGC  
 GAATCCGAAATGCACTTTAGCGAGCTTACCGCGGTGTTGCAGATTTATGATGAAGTGCGC  
 CGCCCGAAAGCGAATAATGTGTGGAATCTGAGCCGCAAAAATGGCAGCATGTATGAATTTG  
 CGGGCCCGGTGTGCGGCGAATTTGCTTACATGATGATAATTTAATAGCGAGAGCCTGGC  
 GAAAATCGCGAAAGTGGTGATGGAAAATTATGAGTGGGCGTGGAATACCAGCGCGGAAGA  
 AGATCGCAATCAGGCGGTGAGCATGCTGAGCAAACCTG

***mtrF***

ATGAGCCAGACCGATGCGCGTCGTAGCGGTCGTTTTCTGCGTACCGTTGAATGGCTGGGCA  
 ACATGCTGCCGCATCCGGTGACGTTATTTATTATTTTATTGTGCTGCTGCTGATCGCGAGCG  
 CGGTGGGCGCGTATTTTGGCCTGAGCGTTCCTGATCCGCGCCCGGTTGGTGCAAAGGTGCG  
 GCGGATGATGGCTTAATTCATGTGGTGAGCCTGCTGGATGCGGATGGCCTGATTAATAATTCT  
 GACCATAACCGTGAAAACTTACC GGCTTTGCGCCGCTGGGCACCGTTTTAGTGAGCCTGT  
 TAGGCGTGGGTATTGCGGAGAAAAGCGGCCTGATTAGCGCGTTAATGCGCCTGTTATTAAC  
 CAAAAGCCCGCGCAAACCTGACCACCTTATGGTGGTGTTTACCGGCATTCTGAGCAACACC  
 GCGAGCGAACTGGGCTATGTGGTGCTGATTCCGCTGAGCGCGGTGATTTTTTCATAGCCTGGG  
 CCGCCATCCGCTGGCGGGTTTAGCGGCGGCGTTTTGCGGGTGTTAGCGGTGGTTATAGCGCG  
 AATCTGTTTCTGGGCACCATTGATCCGCTGCTGGCGGGCATTACCCAGCAGGCGGGCGCAA  
 TTATTCATCCGATTATGTGGTGGGCCCGGAAGCGAACTGGTTCTTTATGGCGGCGAGCACC  
 TTTGTGATTGCGCTGATTGGCTATTTGTGACCGAAAAGATTGTGGAGCCGCAGCTGGGCC  
 GTATCAGAGCGATTTAAGCCAGGAAGAAAAGATATTCGCCATAGCAACGAAATTACCCCG  
 CTGGAATATAAAGGCCTGATTTGGGCGGGCGTGGTGTTTATTGCGCTGAGCGCGTACTGGC  
 GTGGAGCATTGTGCCGCGGATGGCATTCTGCGCCATCCGGAACCGGCCTGGTTGCGGGT  
 TCACCATTTTTAAAAAGCATTGTGGTGTTTATCTTCTGCTGTTTGCCTGCCGGGCATTGTG  
 TATGGCCGATTACCCGCAGCCTGCGCGGTGAACGTGAAGTTGTTAACCGGATGGCGGAAA  
 GCATGAGCACCTGGGCTTATATCTGGTGATTATCTTCTTTGCGGCGCAGTTTGTGGCGTTCT  
 TTAACCTGGACCAACATTGGCCAGTATATTGCGGTGAAAGGCGCGGTGTTTCTGAAAGAAGT  
 GGGCTGGCGGGCAGCGTGCTGTTTATTGGCTTATTCTGATTTGCGCGTTTATCAACCTGA  
 TGATTGGCAGCGCGTCGGCGCAGTGGGCCGTTACCGCGCCTATTTTTGTTCCGATGCTGATG  
 CTGGCGGGCTATGCGCCGGAAGTGATTACAGGCGGCATATCGCATTGGCGATAGCGTGACCA  
 ACATTATTACCCCGATGATGAGCTATTTTGGCCTGATTATGGCGACCGTGATGAAATATAAA  
 AAGGACGCGGGCGTGGGCACCCTGATTAGCATGATGCTGCCGTATAGCGCGTTTTTCTGAT  
 TGCGTGGATTGCGCTGTTTGCATTTGGGTGTTTGTGCTGGGCCTGCCGGTGGGCCCTGGTG  
 CGCCTACCTTGATCCTGCGCCTTAA

**Table S4. Primers for point mutation (ABH and PANAT) in this study.**

| primers | Sequence 5'-3' | Purpose |
|---------|----------------|---------|
|---------|----------------|---------|

|            |                         |                                                                 |
|------------|-------------------------|-----------------------------------------------------------------|
| ABH60226F  | TTGGAAGAAGTGTATCCGGG    | Used for plasmid (pETduet-ABH60 <sub>T226V</sub> ) construction |
| ABH60226R  | CGATGGCCCGGATACACTTC    |                                                                 |
| ABH60272F  | CCAGCAATGATACCGTGGTG    | Used for plasmid (pETduet-ABH60 <sub>T272V</sub> ) construction |
| ABH60272R  | GCCTTTCCACACCACGGTAT    |                                                                 |
| ABH60290F  | TTTTTTCACGTGTATCAGGGC   | Used for plasmid (pETduet-ABH60 <sub>T290V</sub> ) construction |
| ABH60290R  | TCAAAGCCCTGATACACGTG    |                                                                 |
| PANAT211AF | GCGGCGGCGATTACCGAAG     | Used for plasmid (pET28a-PANAT <sub>K211A</sub> ) construction  |
| PANAT211AR | ATCCGGATATAGTTCCTCCTTTC |                                                                 |
| PANAT211CF | CAGGGTCTGTGTGCGGCGAT    | Used for plasmid (pET28a-PANAT <sub>K211C</sub> ) construction  |
| PANAT211CR | GTAATCGCCGCACACAGACC    |                                                                 |
| PANAT211GF | CAGGGTCTGGGCGCGGCGAT    | Used for plasmid (pET28a-PANAT <sub>K211G</sub> ) construction  |
| PANAT211GR | TAATCGCCGCGCCAGACC      |                                                                 |
| PANAT211DF | AGGGTCTGGATGCGGCGATT    | Used for plasmid (pET28a-PANAT <sub>K211D</sub> ) construction  |
| PANAT211DR | GGTAATCGCCGCATCCAGAC    |                                                                 |
| PANAT211SF | AGGGTCTGAGCGCGGCGAT     | Used for plasmid (pET28a-PANAT <sub>K211S</sub> ) construction  |
| PANAT211SR | GTAATCGCCGCGCTCAGAC     |                                                                 |
| PANAT211QF | CAGGGTCTGCAGGCGGCGAT    | Used for plasmid (pET28a-PANAT <sub>K211Q</sub> ) construction  |
| PANAT211QR | GGTAATCGCCGCCTGCAGAC    |                                                                 |
| PANAT211VF | CAGGGTCTGGTTGCGGCGAT    | Used for plasmid (pET28a-PANAT <sub>K211V</sub> ) construction  |
| PANAT211VR | GGTAATCGCCGCAACCAGAC    |                                                                 |
| PANAT211WF | GGGTCTGTGGGCGGCGATT     | Used for plasmid (pET28a-PANAT <sub>K211W</sub> ) construction  |
| PANAT211WR | TCGGTAATCGCCGCCACAG     |                                                                 |
| PANAT211HF | AGGGTCTGCATGCGGCGATT    | Used for plasmid (pET28a-PANAT <sub>K211H</sub> ) construction  |
| PANAT211HR | CGGTAATCGCCGCATGCAG     |                                                                 |
| PANAT211RF | GGTCTGCGTGCGGCGATTAC    | Used for plasmid (pET28a-PANAT <sub>K211R</sub> ) construction  |
| PANAT211RR | CGGTAATCGCCGCACGCAG     |                                                                 |
| PANAT211PF | AGGGTCTGCCTGCGGCGAT     | Used for plasmid (pET28a-PANAT <sub>K211P</sub> ) construction  |
| PANAT211PR | GGTAATCGCCGCAAGCAGAC    |                                                                 |
| PANAT211LF | AGGGTCTGTTAGCGGCGATT    | Used for plasmid (pET28a-PANAT <sub>K211L</sub> ) construction  |
| PANAT211LR | GGTAATCGCCGCTAACAGAC    |                                                                 |
| PANAT211IF | CAGGGTCTGTTTGCAGGCGAT   | Used for plasmid (pET28a-PANAT <sub>K211I</sub> ) construction  |
| PANAT211IR | GGTAATCGCCGCAAACAGAC    |                                                                 |
| PANAT211TF | CAGGGTCTGACTGCGGCGAT    | Used for plasmid (pET28a-PANAT <sub>K211T</sub> ) construction  |
| PANAT211TR | GTAATCGCCGCAGTCAGAC     |                                                                 |
| PANAT211YF | CAGGGTCTGTATGCGGCGAT    | Used for plasmid (pET28a-PANAT <sub>K211Y</sub> ) construction  |



|                |                      |                                                                   |
|----------------|----------------------|-------------------------------------------------------------------|
| PANAT211Y<br>R | GGTAATCGCCGCATACAGAC | construction                                                      |
| PANAT211M<br>F | CAGGGTCTGATGGCGGCGAT | Used for plasmid (pET28a-PANAT <sub>K211M</sub> )<br>construction |
| PANAT211M<br>R | GGTAATCGCCGCCATCAGAC |                                                                   |
| PANAT211NF     | CAGGGTCTGAATGCGGCGAT | Used for plasmid (pET28a-PANAT <sub>K211N</sub> )<br>construction |
| PANAT211N<br>R | GGTAATCGCCGCATTCAGAC |                                                                   |
| PANAT211FF     | CAGGGTCTGTTTGCGGCGAT | Used for plasmid (pET28a-PANAT <sub>K211F</sub> )<br>construction |
| PANAT211FR     | GGTAATCGCCGCAAACAGAC |                                                                   |

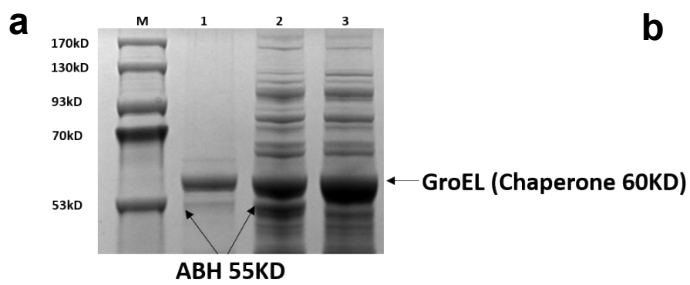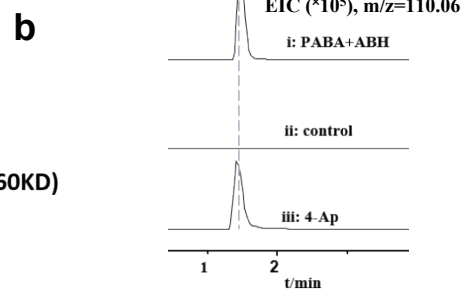

**c**

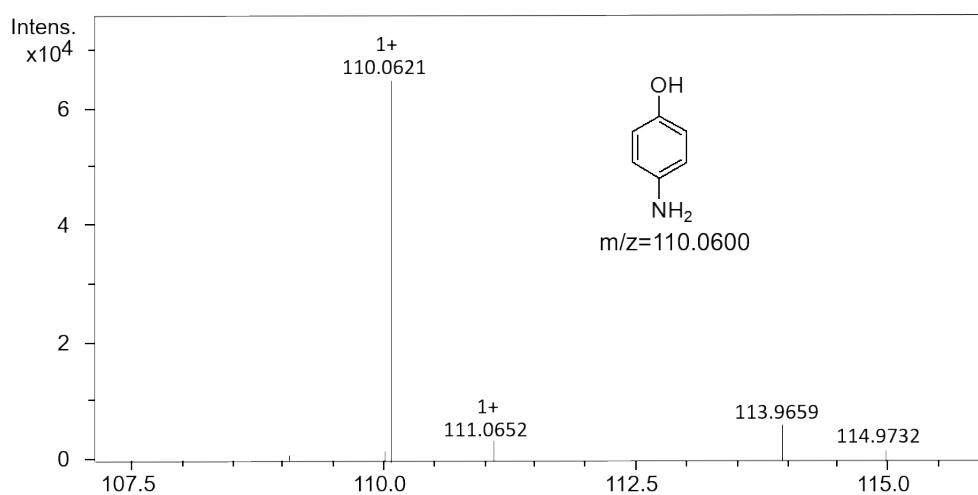

**Figure S1. *In vitro* characterization of ABH.** a) SDS-PAGE of isolated ABH and whole cell. The size of protein ABH and chaperone GroEL are about 55 kD and 60 kD, respectively. M: marker (solarbio. PR1910, MOPS buffer); line1: purified target protein (300 mM imidazole elution from Ni-NTA); line2: *E. coli* BL21 (DE3)-pGro7-ABH whole-cell; line3: control, *E. coli* BL21 (DE3)-pGro7 whole-cell. Criterion MOPS gel (12% precast, Biorad) was used. b) LC-MS analysis of the reaction mixtures of PABA and ABH. I: PABA (3) and ABH; ii: PABA (3); iii: 4-Ap (2) standard. c) Characterization of 4-Ap by ESI-MS.

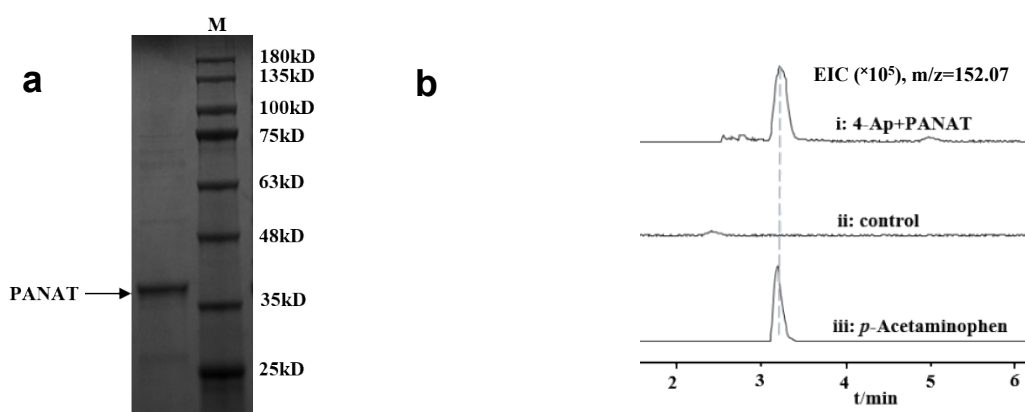

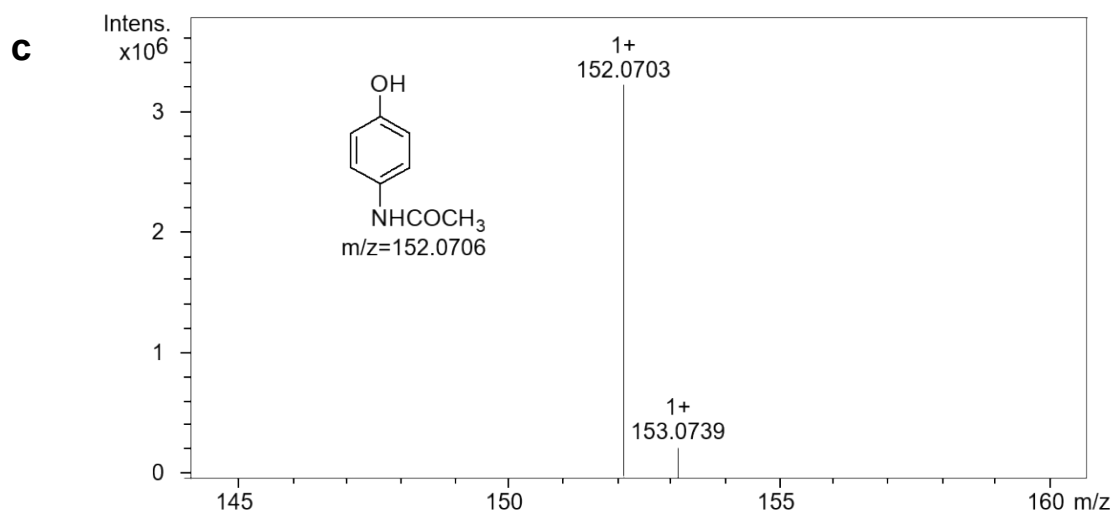

**Figure S2. *In vitro* characterization of PANAT.** a) SDS-PAGE of purified PANAT (about 37 kD). Criterion MOPS gel (12% precast, Biorad) was used. b) LC-MS analysis of the reaction mixtures of 4-Ap and PANAT. I: 4-Ap (**2**) and PANAT; ii: 4-Ap (**2**); iii: *p*-Acetaminophen (APAP, **1**) standard. c) Characterization of APAP by ESI-MS.

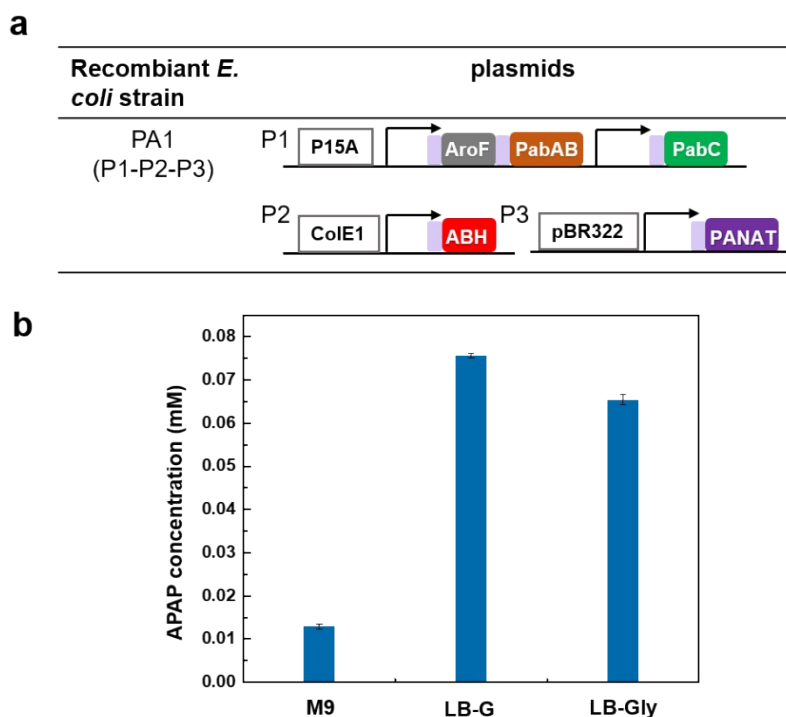

**Figure S3. *In vivo* production of APAP (**1**) in *E. coli* PA1 using the plasmids P1-P2-P3, measured by HPLC after 48h.** a) Construction of *E. coli* cells expressing AroF; PabAB; PabC; PANAT; ABH. Gray filled rectangle: AroF gene; brown filled rectangle: PabAB gene; green filled rectangle: PabC gene; purple filled rectangle: PANAT gene; red filled rectangle: ABH; light purple rectangle: ribosome binding site (RBS). b) Engineered *E. coli* cells for the production of APAP in different mediums (M9, LB-G, and LB-Gly, respectively). P15A: pACYC-Duet-1; pBR322: pET-28a; ColE1: pET-Duet-1; arrow: T7 promoter. Proteins: AroF, DAHP synthetase feedback inhibited by tyrosine; PabAB, *p*-aminobenzoic acid synthase; PabC, 4ADC lyase; ABH, 4-aminobenzoate hydroxylase; PANAT, arylamine N-acetyltransferase. The data shown in b are from three experiment replicates and are expressed as the mean value  $\pm$  SD.

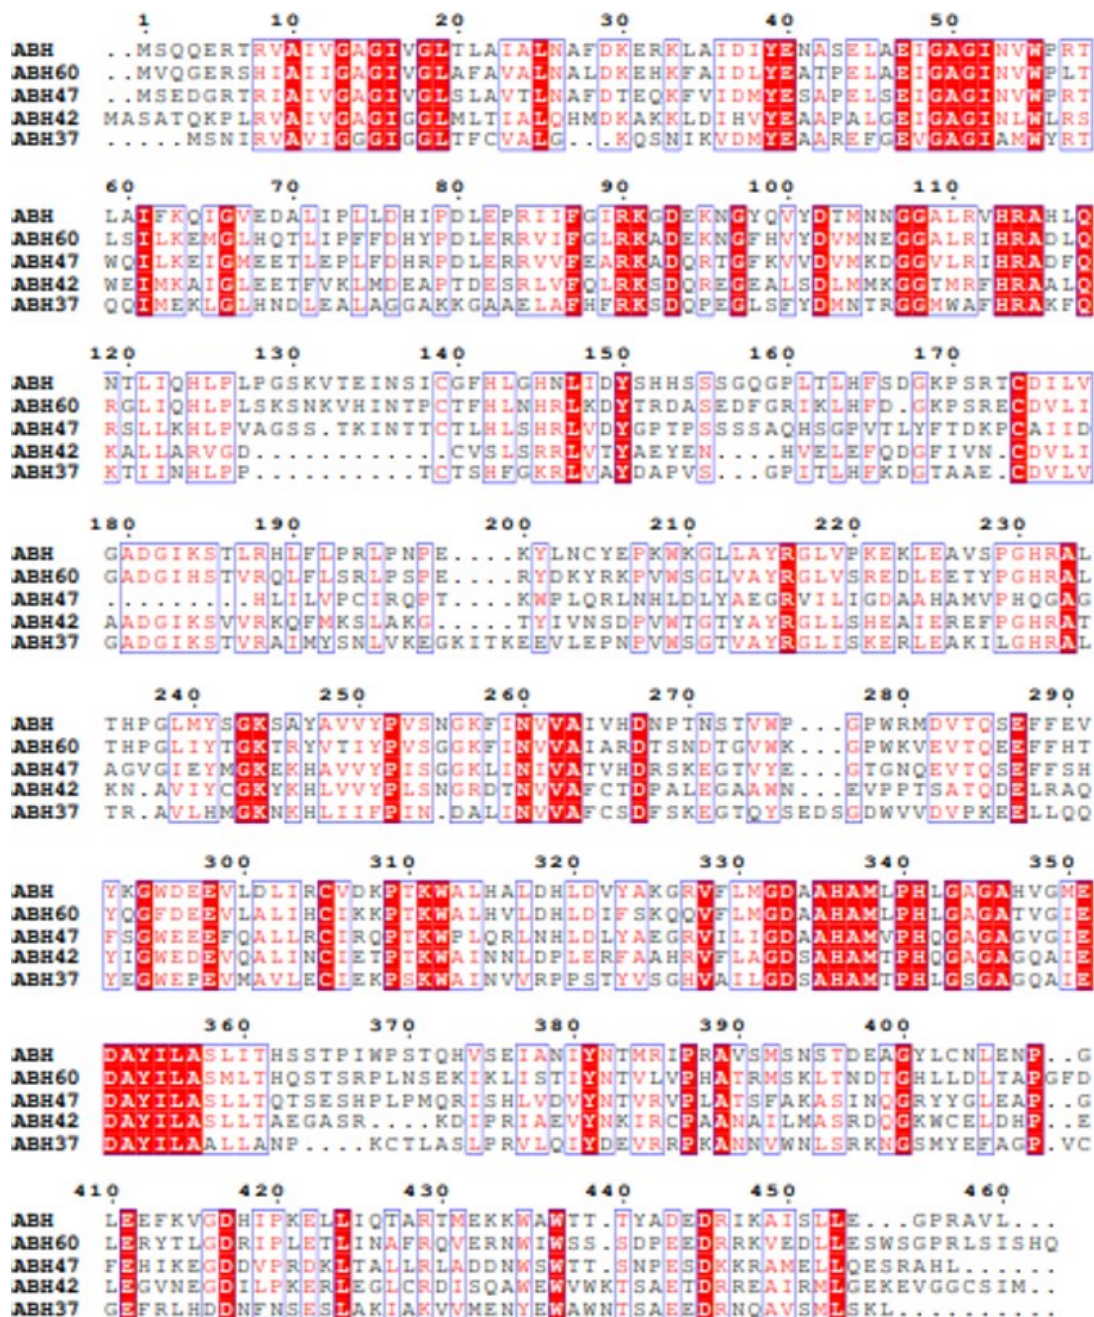

Figure S4. Sequence alignment of ABH (BAA07468.1) with ABH37 from *Fibularhizoctonia* sp. CBS 109695 (RXW22381.1), ABH42 from *Psathyrella aberdarensis* (RXW22381.1), ABH47 from *Leucoagaricus* sp. *SymC.cos* (KXN83799.1), and ABH60 from *Agaricus bisporus* var. *bisporus* H97 (XP\_006456258.1).

Table S5. Schematic of strains harboring constructed plasmids for APAP biosynthesis. Gray filled rectangle: AroF gene; brown filled rectangle: PabAB gene; green filled rectangle: PabC gene; purple filled rectangle: PANAT gene; red filled rectangle: ABH or ABH homologous protein or ABH mutants; light purple rectangle: ribosome binding site (RBS). Recombinant *E. coli* PAB1, PAB2, PAB3, PAB5, PAB6, PAB7, PAB8, PAB9, PAB11 harboring constructed plasmids P1-P3-PB1, P1-P3-PB2, P1-P3-PB3, P1-P3-PB5, P1-P3-PB6, P1-P3-PB7, P1-P3-PB8, P1-P3-PB9, P1-P3-PB11, respectively.

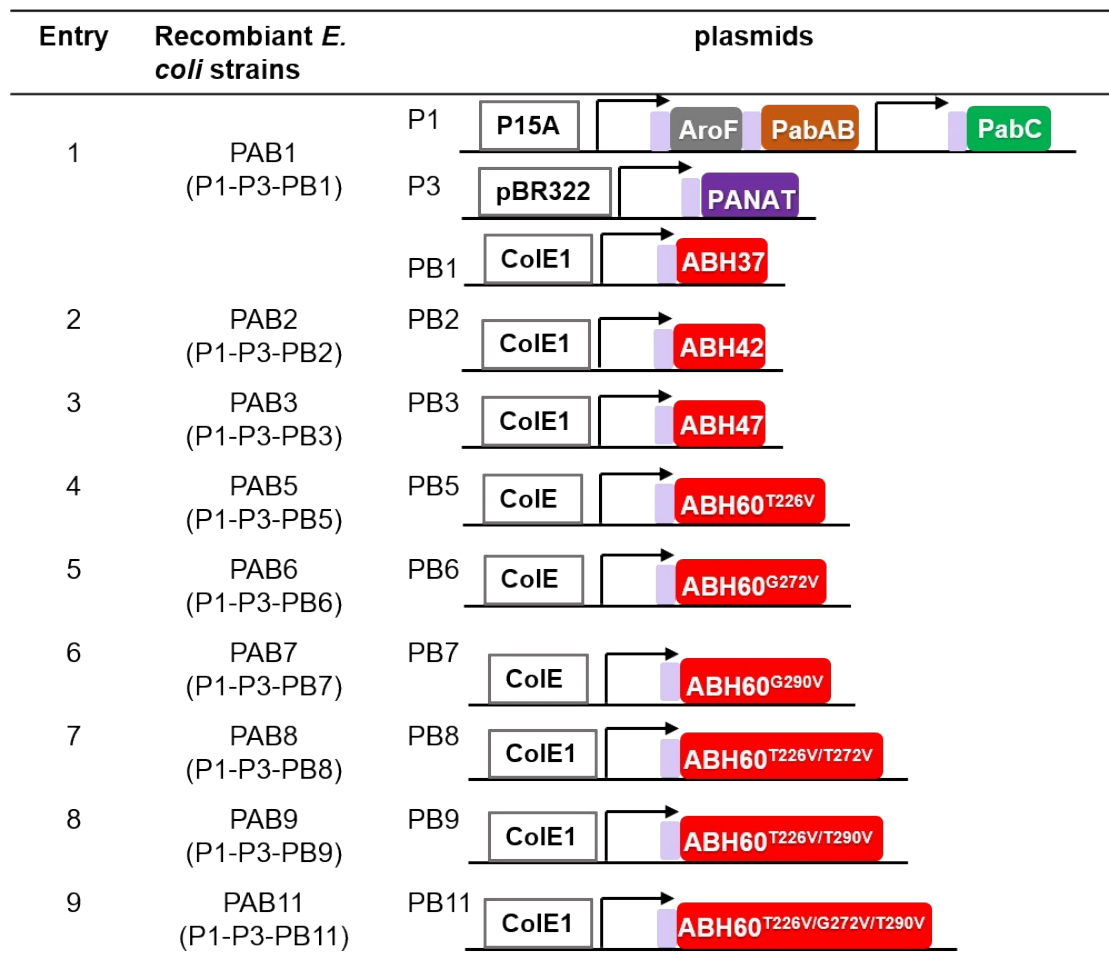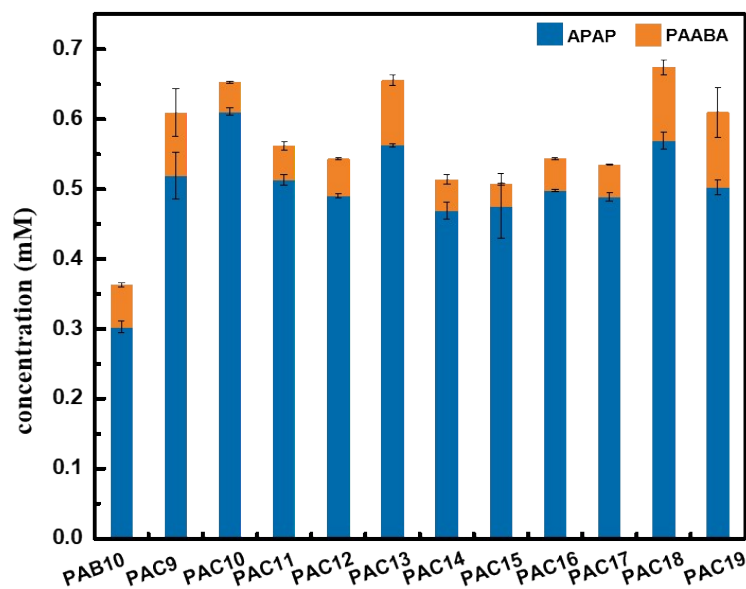

**Figure S5. Titers of APAP: PAABA in PANAT strain and PANAT K211 (V, L, I, S, T, C, M, N, Q, and R respectively) mutant strains.** Blue column: APAP, orange column: PAABA. PAB10 (PANAT); PAC9 (PANAT<sup>K211V</sup>); PAC10 (PANAT<sup>K211L</sup>); PAC11 (PANAT<sup>K211I</sup>); PAC12 (PANAT<sup>K211P</sup>); PAC13 (PANAT<sup>K211S</sup>); PAC14 (PANAT<sup>K211T</sup>); PAC15 (PANAT<sup>K211C</sup>); PAC16 (PANAT<sup>K211M</sup>); PAC17 (PANAT<sup>K211N</sup>); PAC18 (PANAT<sup>K211Q</sup>); PAC19 (PANAT<sup>K211R</sup>). The data shown in Figure S5 are from three experiment replicates and are expressed as the mean value  $\pm$  SD.

**Table S6. Titers of APAP in strains PAC5-PAC19.**

| Entry | Strains       | APAP: PAABA | APAP production (mM, mean value) | APAP production (mg/L, mean value) |
|-------|---------------|-------------|----------------------------------|------------------------------------|
| 1     | PAC5 (K231W)  | 21.7        | 0.4699                           | 71.03                              |
| 2     | PAC6 (K231F)  | 20          | 0.5077                           | 76.74                              |
| 3     | PAC7 (K231H)  | 19.81       | 0.4884                           | 73.83                              |
| 4     | PAC8 (K231Y)  | 19.85       | 0.4756                           | 71.89                              |
| 5     | PAC9 (K231V)  | 5.76        | 0.5189                           | 78.44                              |
| 6     | PAC10 (K231L) | 14.38       | 0.6105                           | 92.28                              |
| 7     | PAC11 (K231I) | 10.58       | 0.5131                           | 77.56                              |
| 8     | PAC12 (K231P) | 9.25        | 0.49                             | 74.07                              |
| 9     | PAC13 (K231S) | 6.07        | 0.5627                           | 85.06                              |
| 10    | PAC14 (K231T) | 10.52       | 0.469                            | 70.89                              |
| 11    | PAC15 (K231C) | 15.1        | 0.4757                           | 71.91                              |
| 12    | PAC16 (K231M) | 11.06       | 0.4981                           | 75.29                              |
| 13    | PAC17 (K231N) | 10.62       | 0.4889                           | 73.90                              |
| 14    | PAC18 (K231Q) | 5.41        | 0.5692                           | 86.04                              |
| 15    | PAC19 (K231R) | 4.68        | 0.5025                           | 75.96                              |

**Table S7. Kinetic parameters of PANAT and PANAT<sup>K211G</sup>.** The data shown in Table S7 are from three experiment replicates and are expressed as the mean value  $\pm$ SD.

| Substrates | Enzymes                | $K_m$ ( $\mu\text{M}^{-1}$ ) | $K_{cat}$ ( $\text{S}^{-1}$ ) | $K_{cat}/K_m$ ( $\mu\text{M}^{-1} \text{S}^{-1}$ ) |
|------------|------------------------|------------------------------|-------------------------------|----------------------------------------------------|
| PABA       | PANAT                  | 613.51 $\pm$ 6.8             | 0.20                          | 3.21 $\times 10^{-4}$                              |
|            | PANAT <sup>K211G</sup> | 1014.67 $\pm$ 11.34          | 0.05                          | 4.63 $\times 10^{-5}$                              |
| 4-AP       | PANAT                  | 596.69 $\pm$ 3.66            | 0.59                          | 9.84 $\times 10^{-4}$                              |
|            | PANAT <sup>K211G</sup> | 473.80 $\pm$ 5.93            | 1.41                          | 2.97 $\times 10^{-3}$                              |

**Table S8. Schematic of strains (PAB10, PAD5 and PAD4) harboring constructed plasmids for APAP biosynthesis.** Gray filled rectangle: AroF gene; brown filled rectangle: PabAB gene; green filled rectangle: PabC gene; purple filled rectangle: PANAT gene; red filled rectangle: ABH<sup>G272V/T290V</sup>; dark green rectangle: EmrE; navy blue rectangle: AaeABRX; light purple rectangle: ribosome binding site (RBS). Recombinant *E. coli* PAB10, PAD5, PAD4 harboring constructed plasmids P1-P3-PB10, P1-P3-PDE, P1-P3-PD4, respectively.

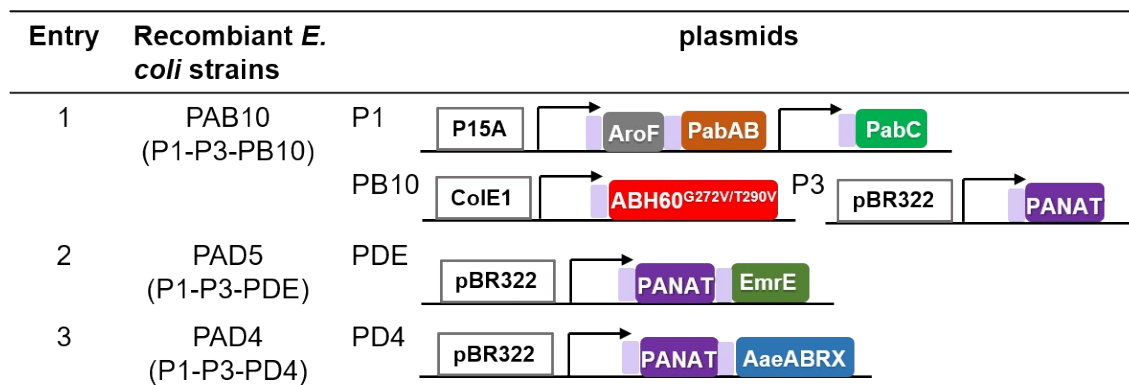

**Table S9. Schematic of strains harboring constructed plasmids for APAP biosynthesis.** Gray filled rectangle: AroF gene; brown filled rectangle: PabAB gene; green filled rectangle: PabC gene; purple filled rectangle: PANAT gene; red filled rectangle: ABH<sup>G272V/T290V</sup>; blue rectangle: scaffolds GBD<sub>x</sub>SH3<sub>y</sub>PDZ<sub>z</sub>; light purple rectangle: ribosome binding site (RBS). Yellow triangle is the ligand to PDZ domain. Light blue round is the ligand to SH3 domain. Recombinant *E. coli* PAB10, PAE1, PAE2, PAE3, PAE4, PAE5 harboring constructed plasmids P1-P3-PB10, PE1-PE2-PE3, PE1-PE2-PE4, PE1-PE2-PE5, PE1-PE2-PE6, PE1-PE2-PE7, respectively.

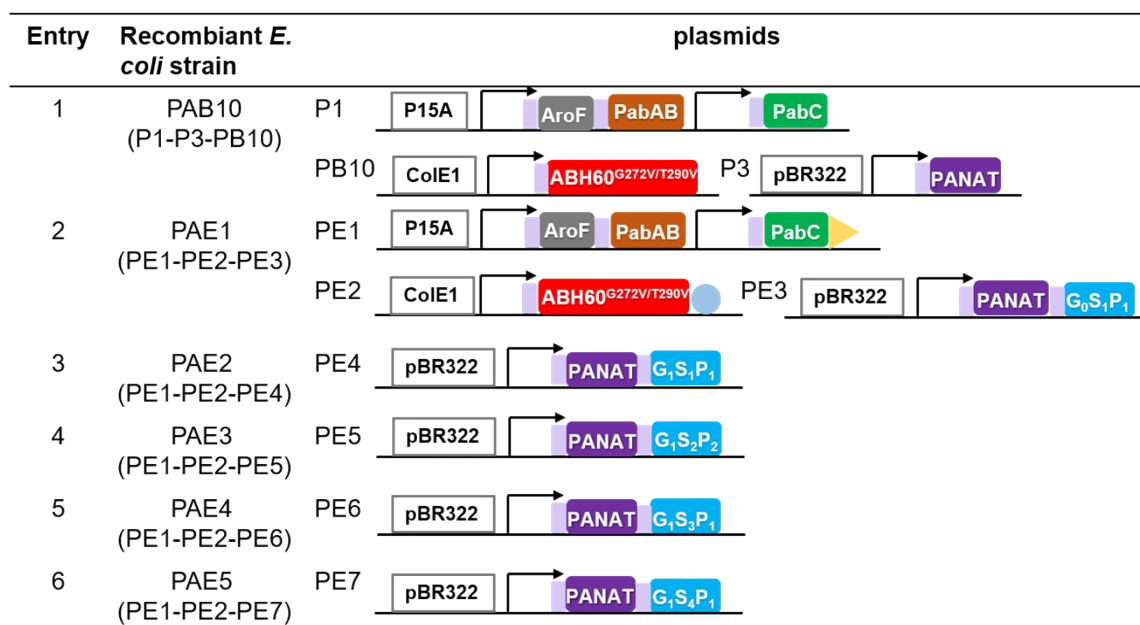

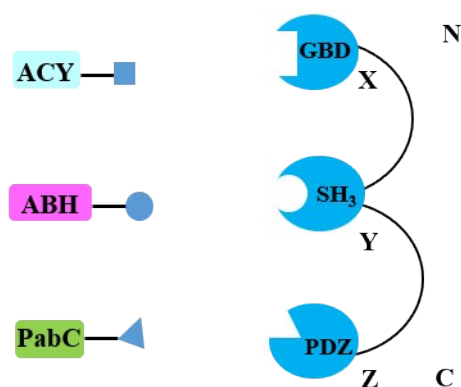

**Figure S6. The diagram for the APAP biosynthetic key enzymes scaffolding strategy.** The GBD domain (GTPase binding domain) is from the actin polymerization switch N-WASP, the SH3 domain (Src homology 3 domain) is from the adaptor protein CRK), and the PDZ (PSD95/DlgA/Zo-1) domain is from the adaptor protein syntrophin. These domains were linked by flexible nine-residue glycine-serine linkers to construct scaffolds GBD<sub>x</sub>SH3<sub>y</sub>PDZ<sub>z</sub>. ACY: PANAT (Arylamine N-acetyltransferase), ABH: 4-aminobenzoate hydroxylase, PabC: 4-amino-4-deoxychorismic acid lyase. Rectangle is the ligand to GBD, Circle is the ligand to SH3 domain, triangle is the ligand to PDZ domain.

**a**

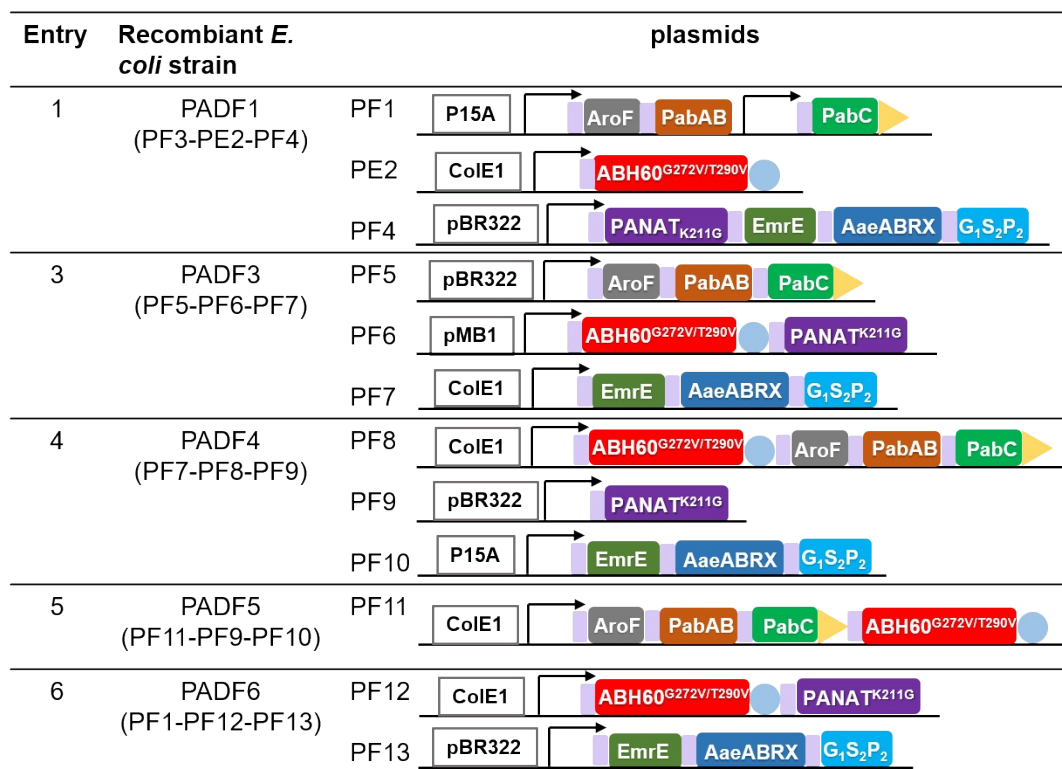



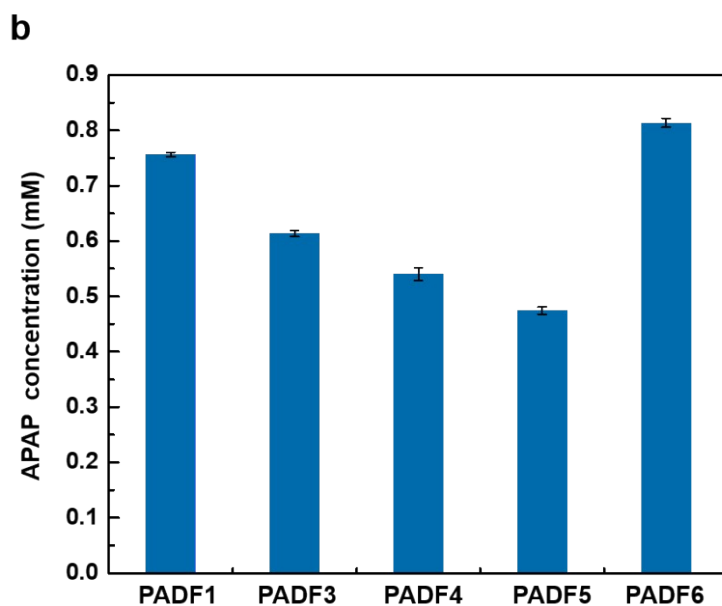

**Figure S7. Improvement of APAP titers by gene module combinations.** a) Schematic of strains harboring constructed plasmids for APAP biosynthesis. b) Engineered *E. coli* cells (PADF1, PADF3, PADF4, PADF5, and PADF6) for the production of APAP. P15A: pACYC-Duet-1; pBR322: pET-28a; ColE1: pET-Duet-1; arrow: T7 promoter. Gray filled rectangle: AroF gene; brown filled rectangle: PabAB gene; green filled rectangle: PabC gene; purple filled rectangle: PANAT<sup>K231G</sup> gene; red filled rectangle: ABH60<sup>G272V/T290V</sup> gene, dark green rectangle: EmrE; navy blue rectangle: AaeABRX; blue rectangle: G<sub>1</sub>S<sub>2</sub>P<sub>2</sub>; light purple rectangle: ribosome binding site (RBS). Yellow triangle is the ligand to PDZ domain. Light blue round is the ligand to SH3 domain. The data shown in b are from three experiment replicates and are expressed as the mean value  $\pm$  SD.

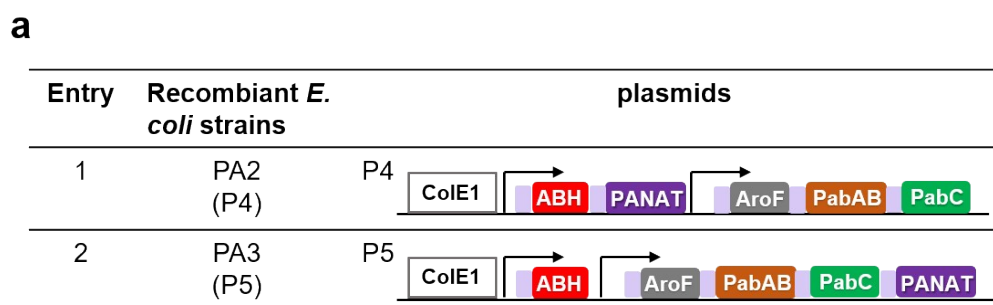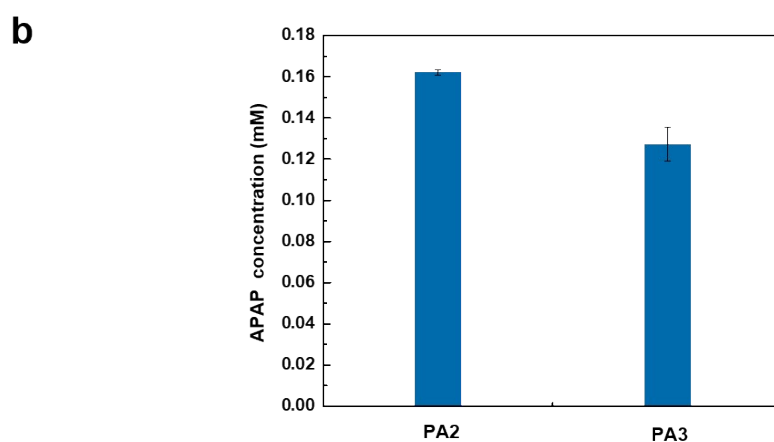

**Figure S8. *In vivo* production of APAP (1) in *E. coli* PA2 and PA3 using the gene clusters P4 and P5 respectively, measured by HPLC after 48h.** a) Construction of *E. coli* cells expressing gene clusters (containing AroF, PabAB, PabC, PANAT, ABH). b) Engineered *E. coli* PA2 and PA3 for the production of APAP (1). ColE1: pET-Duet-1; arrow: T7 promoter. Proteins: AroF, DAHP synthetase feedback inhibited by tyrosine; PabAB, *p*-aminobenzoic acid synthase; PabC, 4ADC lyase; ABH, 4-aminobenzoate hydroxylase; PANAT, arylamine N-acetyltransferase. Gray filled rectangle: AroF gene; brown filled rectangle: PabAB gene; green filled rectangle: PabC gene; purple filled rectangle: PANAT gene; red filled rectangle: ABH; light purple rectangle: ribosome binding site (RBS). Recombinant *E. coli* PA2, PA3 harboring constructed plasmids P4, P5, respectively. The data shown in b are from three experiment replicates and are expressed as the mean value  $\pm$  SD.

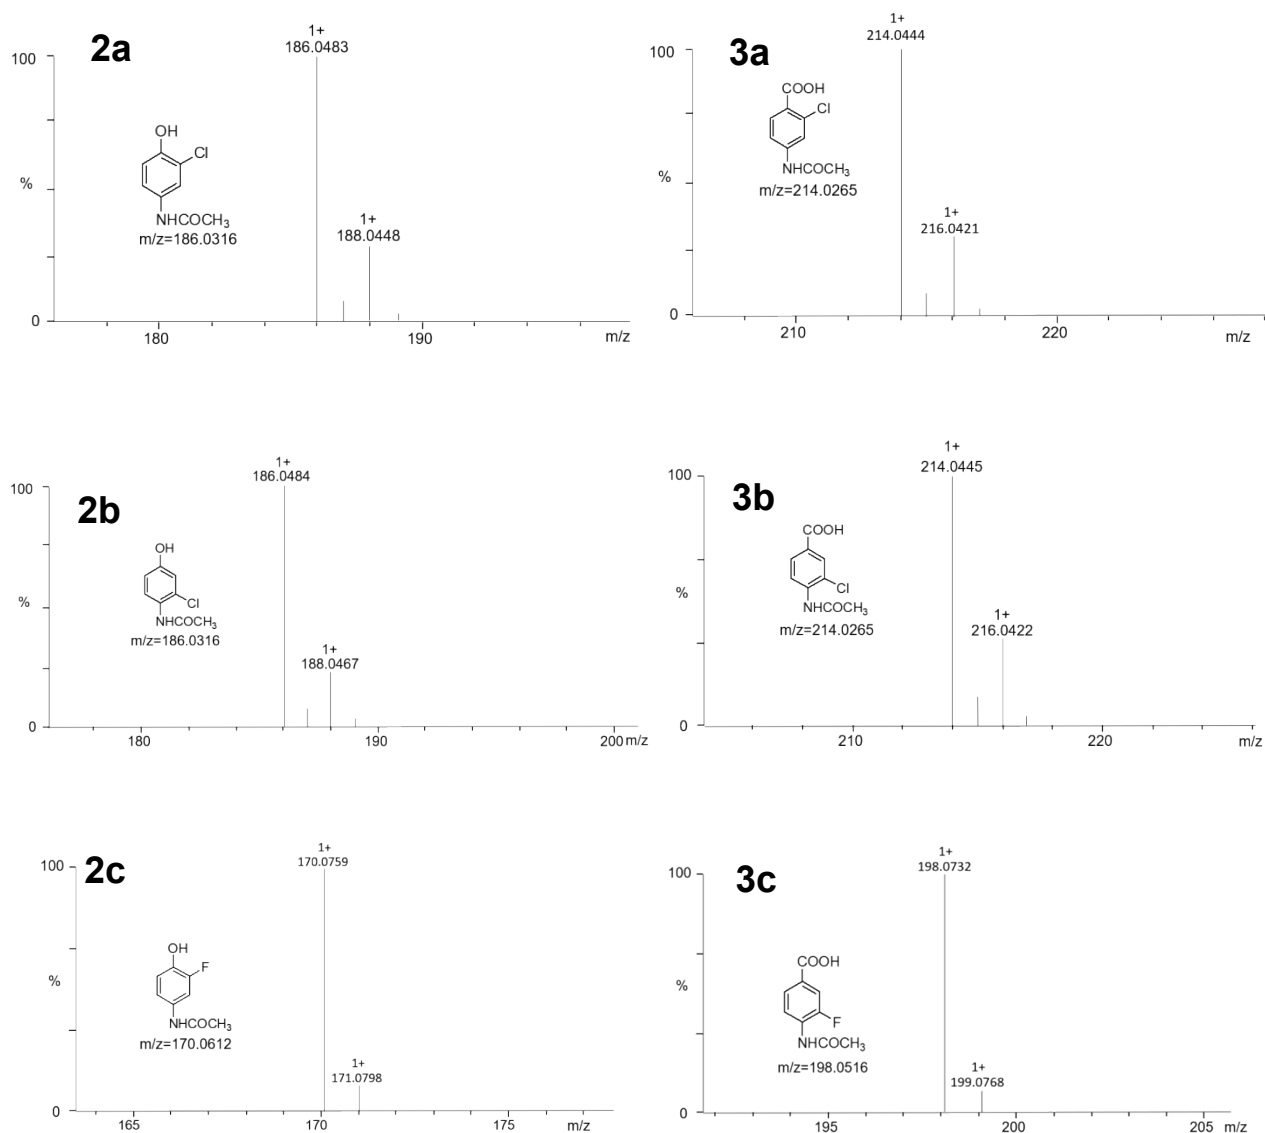

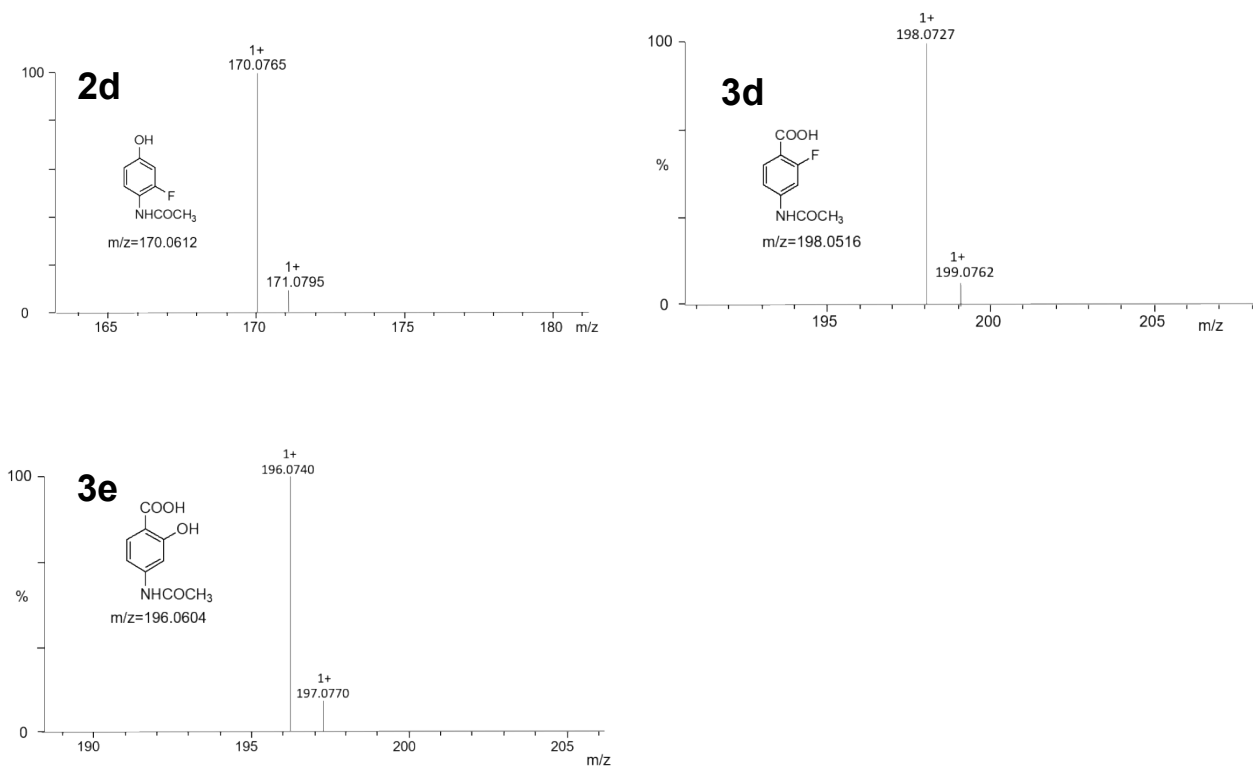

**Figure S9.** Characterization of **2a**, **3a**, **2b**, **3b**, **2c**, **3c**, **2d**, **3d**, **3e** by ESI-MS.

**Table S10.** The amino acid sequence of GBD domain, the SH3 domain, and the PDZ domain.

|                                                                                                     |
|-----------------------------------------------------------------------------------------------------|
| <b>GBD</b>                                                                                          |
| TKADIGTPSNFQHIGHVWDPNTGFDLNLDPELKNLFDMCGISEAQLKDRETSKVIYDFIEKTG<br>GVEAVKNELRRQAP                   |
| <b>SH3</b>                                                                                          |
| AEYVRALDFDFNGNDEEDLPFKKGDILRIRDKPEEQWWNAEDSEGKRGMIKVPYVEKY                                          |
| <b>PDZ</b>                                                                                          |
| LQRRRVTVRKADAGGLGISIKGGRENKMPILISKIFKGLAADQTEALFVGDAILSVNGEDLSSA<br>THDEAVQALKKTGKEVVLEVKYMKEVSPYFK |

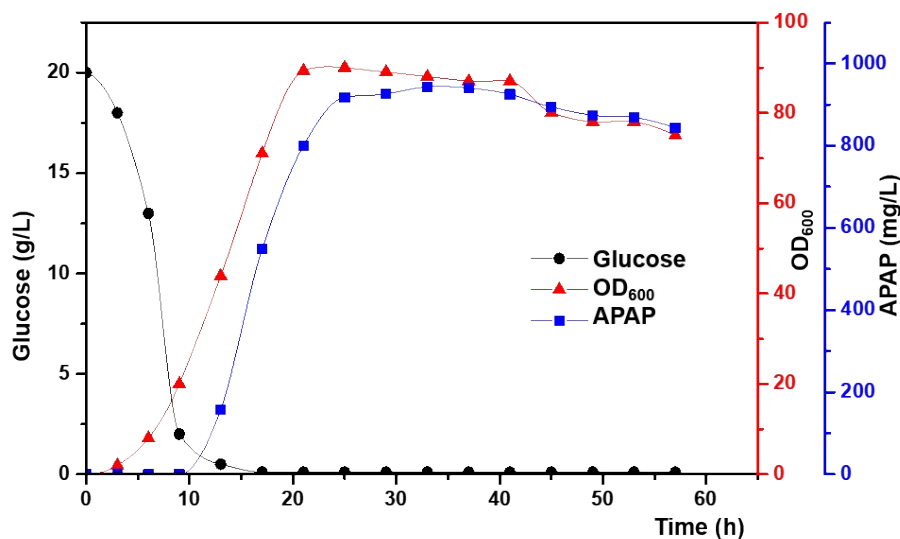

**Figure S10. Fed-batch fermentation of PADF2.** The strain PADF2 was inoculated into the fermentation medium with 20 g/L glucose (as described in section 2.9). When the cell density reached to an OD<sub>600</sub> of 20 after nine hours of cultivation (The residual sugar concentration was about 2 g/L), the recombinant proteins were induced by 0.1 mM IPTG.

Dissolved oxygen level was maintained at 30% through automatic control of the agitation speed varying from 400 to 1000 rpm. The pH was regulated by the addition of NH<sub>3</sub>·H<sub>2</sub>O. Glucose (400 g/L) was added to maintain a low residual concentration of about 200 mg/L to avoid glucose inhibition. OD<sub>600</sub> was marked with red triangle, residual glucose was marked with black circle, and APAP was marked with blue square.

## References

- [1] Tsuji H, Ogawa T, Bando N, et al. Purification and properties of 4-aminobenzoate hydroxylase, a new monooxygenase from *Agaricus bisporus*[J]. Journal of Biological Chemistry, 1986, 261(28):13203-13209.
- [2] Westwood I M, Holton S J, Rodrigues-Lima F, et al. Expression, purification, characterization and structure of *Pseudomonas aeruginosa* arylamine N-acetyltransferase[J]. Biochemical Journal, 2005, 385(Pt 2):605-612.
- [3] Wang F, Zhao J, Li Q, et al. One-pot biocatalytic route from cycloalkanes to  $\alpha$ ,  $\omega$ -dicarboxylic acids by designed *Escherichia coli* consortia[J]. Nature Communications, 2020, 11(1).
- [4] Koma D, Yamanaka H, Moriyoshi K, et al. Production of *p*-aminobenzoic acid by metabolically engineered *Escherichia coli*[J]. Bioscience Biotechnology & Biochemistry, 2014, 78(2):350-357.
